# Supplementary material
Source: PubMed Central journal article supplement (PMC4394273)
Supplement: pnas.201424989SI.pdf [file pnas.201424989SI.pdf]

# Supporting Information

## King 10.1073/pnas.1424989112

### SI Materials and Methods

A CO-oxidizing halophile was enriched from BSF-1 sediment slurries in neoprene-stoppered 160-cm<sup>3</sup> serum bottles containing about 100-ppm headspace CO concentrations and CM1 medium (1) with a sodium chloride concentration of 3.8 M and sodium pyruvate as a carbon and energy source (25 mM). Serum bottles were shaken at 100 rpm on a rotary shaker at 40 °C. Enrichments positive for CO uptake were transferred through several rounds of liquid culture; isolates were obtained from colonies that grew on CM1 plates solidified with 1.5% (wt/vol) agar. Genomic DNA extracted from purified isolates with an UltraClean Microbial DNA

Kit (MO BIO) was used to amplify 16S rRNA genes with primers 21f and 1492r and standard amplification protocols (e.g., 2, 3). Amplicons were sequenced by the Louisiana State University Core Genome Facility (3). The 16S rRNA gene sequence of isolate BSF-1 was subjected to BLAST (4) analysis and classification using the SINA aligner (5); both indicated that isolate BSF-1 was a member of the Euryarchaeota extreme halophiles in the genus *Halorubrum* and most closely related to *H. lipolyticum*. A phylogenetic analysis of aligned 16S rRNA gene sequences in the ARB database from validated members of *Halorubrum* and *Halobacterium* was conducted using MEGA6.06 (6) and a maximum-likelihood algorithm.

1. Burns DG, et al. (2007) *Haloquadratum walsbyi* gen. nov., sp. nov., the square haloarchaeon of Walsby, isolated from saltern crystallizers in Australia and Spain. *Int J Syst Evol Microbiol* 57(Pt 2):387–392.
2. Miyashita A, et al. (2009) Development of 16S rRNA gene-targeted primers for detection of archaeal anaerobic methanotrophs (ANMEs). *FEMS Microbiol Lett* 297(1): 31–37.
3. King CE, King GM (2014) *Thermomicrobium carboxidovorans* K13<sup>T</sup> sp. nov., and *Thermorudis peleae* K14<sup>T</sup> gen. nov., sp. nov., carbon monoxide-oxidizing bacteria from geothermally-heated biofilms. *Int J Syst Evol Microbiol* 64(Pt 8):2586–2592.
4. Altschul SF, Gish W, Miller W, Myers EW, Lipman DJ (1990) Basic local alignment search tool. *J Mol Biol* 215(3):403–410.
5. Pruesse E, Peplies J, Glöckner FO (2012) SINA: Accurate high-throughput multiple sequence alignment of ribosomal RNA genes. *Bioinformatics* 28(14):1823–1829.
6. Tamura K, Stecher G, Peterson D, Filipiński A, Kumar S (2013) Molecular evolutionary genetics analysis version 6.0. *Mol Biol Evol* 30(12):2725–2729.

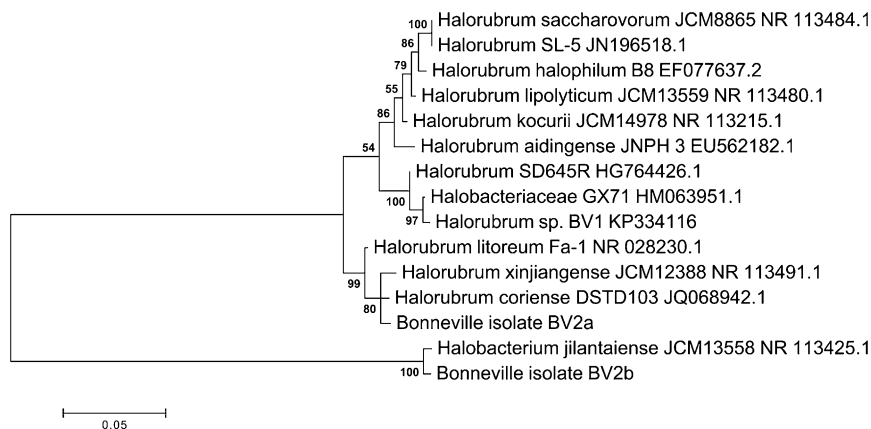

**Fig. S1.** Phylogenetic analysis of partial 16S rRNA gene sequences for isolate *Halorubrum* sp. BV1 and other select members of the genus. A sequence from *Halobacterium jilantaiense* JCM-13558 was used as an outgroup. Phylogenetic relationships were inferred using maximum likelihood with a GTR (general time-reversible) model. Branch support is indicated for 100 bootstrap replicates.



**Table S1. Sample locations, sampling dates, water potentials, and apparent maximum CO uptake rates**

| Site                               | GPS position           | Date           | H <sub>2</sub> O potential, MPa | CO uptake rate, nmol gfw <sup>-1</sup> ·h <sup>-1</sup> |
|------------------------------------|------------------------|----------------|---------------------------------|---------------------------------------------------------|
| MacKenzie State Park, HI           |                        |                |                                 |                                                         |
| 1.1                                | 19.439389 x 155.862472 | 9 April 2014   | -3.2                            | 22.7                                                    |
| 1.2                                | 19.439389 x 155.862472 | 9 April 2014   | -3.7                            | 16.2                                                    |
| 1.3                                | 19.439389 x 155.862472 | 9 April 2014   | -13.2                           | ND                                                      |
| 2.1                                | 19.439389 x 155.862472 | 9 April 2014   | -39.1                           | ND                                                      |
| 2.2                                | 19.439389 x 155.862472 | 9 April 2014   | -39.7                           | ND                                                      |
| 2.3                                | 19.439389 x 155.862472 | 9 April 2014   | -28.5                           | 0.40                                                    |
| 3.1                                | 19.355878 x 155.862220 | 9 April 2014   | -3.1                            | 2.70                                                    |
| 3.2                                | 19.355878 x 155.862220 | 9 April 2014   | -2.4                            | ND                                                      |
| 3.3                                | 19.355878 x 155.862220 | 9 April 2014   | -5.3                            | 3.5                                                     |
| 2.1                                | 19.439389 x 155.862472 | 7 July 2014    | -0.8                            | 4.8                                                     |
| 2.2                                | 19.439389 x 155.862472 | 7 July 2014    | -0.7                            | 5.8                                                     |
| 2.3                                | 19.439389 x 155.862472 | 7 July 2014    | -2.1                            | 0.79                                                    |
| 2.4                                | 19.439389 x 155.862472 | 7 July 2014    | -1.3                            | 0.48                                                    |
| 2.5                                | 19.439389 x 155.862472 | 7 July 2014    | -0.5                            | 0.14                                                    |
| 2.6                                | 19.439389 x 155.862472 | 7 July 2014    | -0.6                            | 0.09                                                    |
| 3.1                                | 19.355878 x 155.862220 | 7 July 2014    | -1.6                            | 1.3                                                     |
| 3.2                                | 19.355878 x 155.862220 | 7 July 2014    | -1.0                            | 1.8                                                     |
| 3.3                                | 19.355878 x 155.862220 | 7 July 2014    | -0.6                            | 0.43                                                    |
| Holei Sea Arch, HI                 |                        |                |                                 |                                                         |
| HSA1                               | 19.389361 x 155.249028 | 8 July 2014    | -42.7                           | 0.58                                                    |
| HSA2                               | 19.389361 x 155.249028 | 8 July 2014    | -33.3                           | 0.36                                                    |
| HSA3                               | 19.389361 x 155.249028 | 8 July 2014    | -43.0                           | ND                                                      |
| HSA4                               | 19.389361 x 155.249028 | 8 July 2014    | -3.6                            | 0.32                                                    |
| HSA5                               | 19.389361 x 155.249028 | 8 July 2014    | -44.2                           | 0.23                                                    |
| HSA6                               | 19.389361 x 155.249028 | 8 July 2014    | -9.7                            | ND                                                      |
| HSA7                               | 19.389361 x 155.249028 | 8 July 2014    | -6.0                            | ND                                                      |
| HSA8                               | 19.389361 x 155.249028 | 8 July 2014    | -117.4                          | 0.26                                                    |
| Bonneville Salt Flats, UT          |                        |                |                                 |                                                         |
| Wendover                           | 40.515472 x 114.044917 | 22 July 2013   | -41.2                           | 0.23                                                    |
| BSF-1*                             | 40.737722 x 113.858694 | 13 August 2013 | -41.5                           | 0.10                                                    |
| Atacama Desert, Chile <sup>†</sup> |                        |                |                                 |                                                         |
| LL2A                               | -23.062444 x 68.215278 | 13 August 2013 | -10.4                           | 0.16                                                    |
| LL3                                | -23.062444 x 68.215278 | 13 August 2013 | -11.5                           | 0.17                                                    |
| LL4                                | -23.062444 x 68.215278 | 13 August 2013 | -11.8                           | 0.06                                                    |
| LL8                                | -23.062444 x 68.215278 | 13 August 2013 | -9.3                            | 0.16                                                    |
| Cejar 3                            | -21.266667 x 69.616667 | 13 August 2013 | -7.5                            | 0.10                                                    |
| LL2A                               | -23.062444 x 68.215278 | 28 April 2014  | -10.4                           | 0.12                                                    |
| LL3                                | -23.062444 x 68.215278 | 28 April 2014  | -11.5                           | 0.12                                                    |
| LL4                                | -23.062444 x 68.215278 | 28 April 2014  | -11.8                           | 0.12                                                    |
| LL8                                | -23.062444 x 68.215278 | 28 April 2014  | -9.3                            | NA                                                      |
| Cejar 3                            | -21.266667 x 69.616667 | 28 April 2014  | -7.5                            | 0.11                                                    |

Water potential and CO uptake rates were measured as described in the text. NA, not assayed; ND, not detectable.

\*BSF-1 was collected on 25 July 2013; the assay date is given in the table.

<sup>†</sup>LL and Cejar samples were collected on 22 and 23 May 2013, respectively; the assay dates are given in the table.

**Table S2. CO uptake rates [nmol (mg cell dry weight)<sup>-1</sup>·h<sup>-1</sup> ± 1 SE, n = 3] observed for *A. ehrlichii* MLHE-1 incubated under conditions of varied water potential and temperature**

| Treatment                                 | -8.3 MPa    |              | -18.1 MPa   |             |
|-------------------------------------------|-------------|--------------|-------------|-------------|
|                                           | 6 °C        | 30 °C        | 6 °C        | 30 °C       |
| Rate, nmol <sup>-1</sup> ·h <sup>-1</sup> | 5.95 ± 0.12 | 19.32 ± 2.16 | 0.14 ± 0.08 | 1.55 ± 0.07 |

Rates for treatments with varied water potential and temperature were obtained for cells incubated with starting headspace CO concentrations of ~70 ppm and were based on initial linear uptake.
